# Supplementary material for: Mechanism of two styryl BODIPYs as fluorescent probes and protective agents in lipid bilayers against aqueous ClO −
Source: Royal Society of Chemistry journal article supplement (doi:10.1039/d4ra03433c), 2024-01-01
Supplement: d4ra03433c1.pdf [file d4ra03433c1.pdf]

## Supporting Information

### **Mechanism of two styryl BODIPYs as fluorescent probes and protective agents in lipid bilayer against aqueous $\text{ClO}^-$**

Lu Yang, † Yanglin Jiang, † Ailin Sun, Mingqing Chen, Qiwei Li, Peng Wang\* and Jianping Zhang

*Department of Chemistry, School of Chemistry and Life Resources, Renmin University of China, Beijing 100872, China*

†L.Y. and †Y.J. contributed equally to this work.

E-mail addresses of authors :

Lu Yang, [2021102251@ruc.edu.cn](mailto:2021102251@ruc.edu.cn)

Yanglin Jiang, [jiangyanglin@ruc.edu.cn](mailto:jiangyanglin@ruc.edu.cn)

Ai-Lin Sun, [sunailin@ruc.edu.cn](mailto:sunailin@ruc.edu.cn)

Ming-Qing Chen, [cmq@ruc.edu.cn](mailto:cmq@ruc.edu.cn)

Jianping Zhang, [jpzhang@ruc.edu.cn](mailto:jpzhang@ruc.edu.cn)

Qiwei Li, [2022102195@ruc.edu.cn](mailto:2022102195@ruc.edu.cn)

\* Corresponding author, E-mail address:

Dr. Peng Wang, [wpeng\\_chem@ruc.edu.cn](mailto:wpeng_chem@ruc.edu.cn)

Tel.: +86 10 62516604.

## Table of contents

|                                                                                                                          |      |
|--------------------------------------------------------------------------------------------------------------------------|------|
| I. Synthetic routes and structural characterization by NMR and HRMS .....                                                | S1-4 |
| II. lipid-water partition coefficient.....                                                                               | S5   |
| III. ESI-HRMS characterization of oxidative products of BOH and BOE.....                                                 | S6   |
| IV.                    GUV                    morphology                    changes                    over<br>time..... | S7   |
| V. HPLC-HRMS results of the oxidized products of PLPC and DOPC.....                                                      | S8-9 |

## I. Synthetic routes and structural characterization by NMR and HRMS

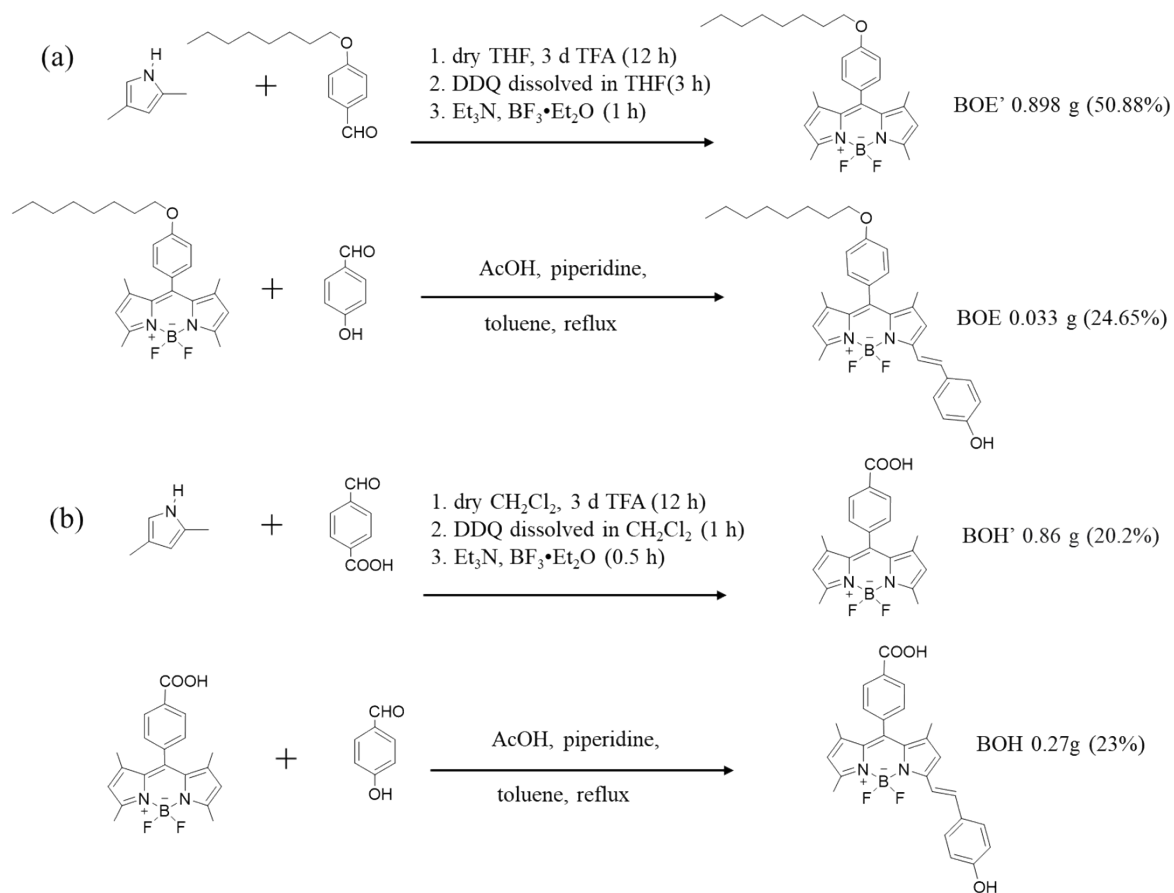

**Fig. S1.** Synthetic routes for BOE (a) and BOH (b). The yields were listed in parentheses.

### 1. Synthetic procedures of **BOE**:

4-(Octyloxy) benzaldehyde (0.8225 g, 3.51 mmol) and 2,4-dimethylpyrrole (0.6879 g, 7.23 mmol) were dissolved in dry tetrahydrofuran (THF, 90 mL) under a nitrogen atmosphere. Three drops of trifluoroacetic acid (TFA) (about 0.2 mL) were added, and the mixture was stirred at room temperature overnight. After TLC monitoring showed complete disappearance of the aldehyde, a solution of 2,3-dichloro-5,6-dicyano-1,4-benzoquinone (DDQ) (0.6775 g, 2.98 mmol) in anhydrous THF (75 mL) was added. This mixture was

further stirred for 3 h, then 18 mL of Et<sub>3</sub>N and 18 mL of BF<sub>3</sub>·OEt<sub>2</sub> were successively added and after reacting 1 h, the reaction mixture was washed thoroughly with water and brine, dried over anhydrous Na<sub>2</sub>SO<sub>4</sub>, filtered, and evaporated under vacuum. The crude product was purified by silica gel column chromatography (eluent: petroleum ether/ethyl acetate v/v ratio changing from 250/1 finally to 250/12) to obtain a shiny orange powder (0.8980 g, yield: 50.88%) as **BOE'**.

**BOE'** (0.1200 g, 0.27 mmol) and *p*-hydroxybenzaldehyde (0.1130 g, 0.93 mmol) were added to a 100 mL round-bottomed flask containing 16 mL toluene, piperidine (1.6 mL) and acetic acid (0.7 mL) were added to the mixed solution, and condensed at 110 °C for 17 h. After cooling to room temperature, the reaction mixture was washed thoroughly with water and brine, dried over anhydrous Na<sub>2</sub>SO<sub>4</sub>, filtered, and evaporated under vacuum. The crude compound was purified by silica gel column chromatography (eluent: dichloromethane/methanol v/v ratio changing from 500/1 finally to 500/4) to give a purple-black solid (0.0330 g, yield: 24.65%) as **BOE**. <sup>1</sup>H NMR (400 MHz, CDCl<sub>3</sub>) δ 7.07(s, 3H), 6.92(s, 2H), 6.75(s, 2H), 6.49(s, 1H), 5.91(s, 1H), 5.21(s, 1H), 3.93(s, 2H), 2.54 (d, *J* = 39.9 Hz, 6H), 1.74(s, 3H), 1.38(m, *J* = 18.5 Hz, 10H), 0.82(s, 7H). <sup>13</sup>C NMR (150 MHz, CDCl<sub>3</sub>) δ 158.67, 156.34, 153.20, 152.41, 141.81, 141.26, 139.20, 135.37, 132.24, 131.01, 128.37, 128.16, 127.92, 125.89, 119.92, 116.42, 115.56, 114.86, 114.01, 67.17, 52.41, 39.46, 30.90, 30.79, 28.68, 28.38, 28.24, 28.21, 25.04, 21.64, 13.83, 13.65, 13.54, 13.09 ppm. HRMS (EI) *m/z* calcd for C<sub>34</sub>H<sub>39</sub>BF<sub>2</sub>N<sub>2</sub>NaO<sub>2</sub><sup>+</sup>: 579.2965; Found 579.2963.

## 2. Synthetic procedures of **BOH**:

2,4-dimethylpyrrole (22.10 mmol, 2.1026 g), 4-carboxybenzaldehyde (13.90 mmol, 2.0868 g), and 400 mL of CH<sub>2</sub>Cl<sub>2</sub> degassed by argon were added to a 1 L round-bottomed flask, then a few drops of trifluoroacetic acid (TFA) were added, and the mixture was stirred under N<sub>2</sub> protection for 1 day. Then, add DDQ (9.90 mmol, 2.2474 g) dissolved in 100 mL CH<sub>2</sub>Cl<sub>2</sub> to the mixture and continue stirring for 1 hour. Finally, 5 mL Et<sub>3</sub>N and 5 mL BF<sub>3</sub>·OEt<sub>2</sub> were added to the mixture and the reaction continued for 30 minutes. The mixed solution after the reaction was extracted, washed with water three times, dried with anhydrous Na<sub>2</sub>SO<sub>4</sub>, and evaporated solvent using a rotary evaporator to get the remaining product. By silica gel column chromatography and chloroform/methanol (v/v = 98/2) as eluent, the purified **BOH'** was obtained as red solid (0.8600 g, yield: 20.2%).

**BOH'** (2.50 mmol, 0.9229 g) and *p*-hydroxybenzaldehyde (7.50 mmol, 0.9159 g) were added to a 500 mL round-bottomed flask containing 200 mL toluene, piperidine (0.5 mL) and acetic acid (0.5 mL) were added to the mixture, and the mixture was heated at 110 °C. The water and toluene were separated with a Dean-Stark water separator, and the reaction was monitored with TLC. When the reaction material is completely consumed, the mixture is cooled to room temperature. After the reaction, the mixed solution was washed three times with water and dried with anhydrous Na<sub>2</sub>SO<sub>4</sub>. The residual product was purified by silica gel column chromatography. chloroform/methanol (v/v = 97/3) mixture was used as eluent to give purplish black solid (0.2700 g, yield: 23.0%). The characterization results were shown

in our previous work.

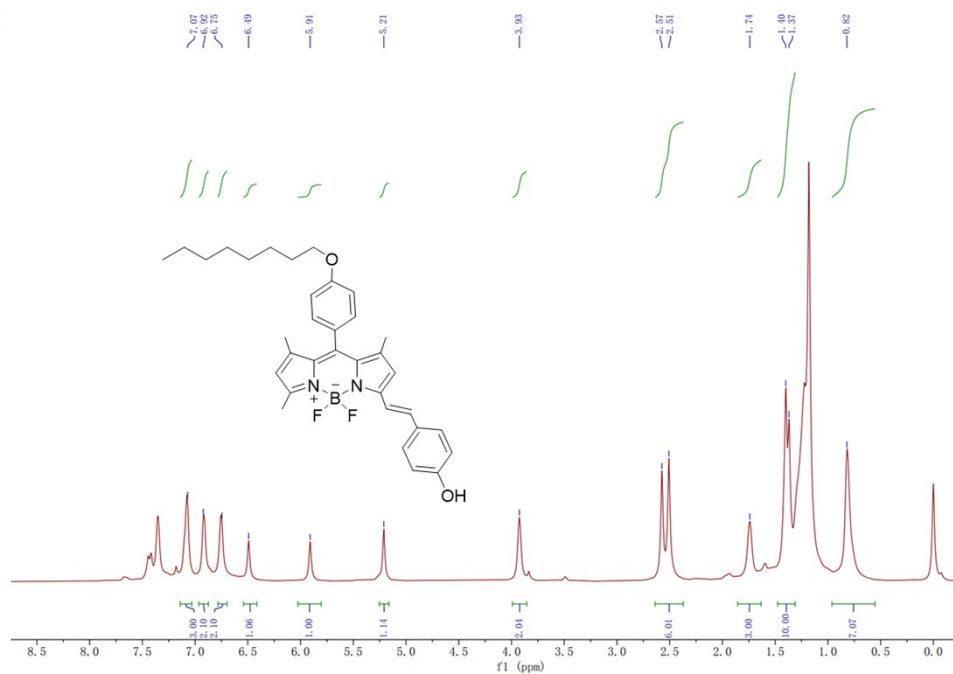

Figure S2. <sup>1</sup>H NMR spectrum of BOE.

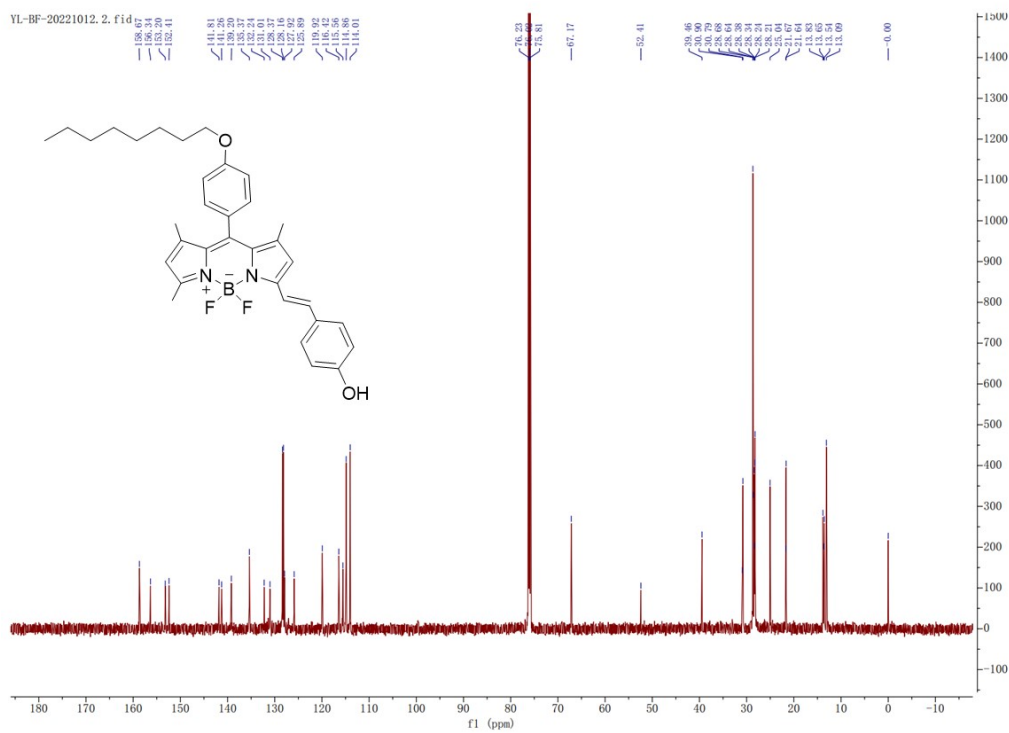

Figure S3. <sup>13</sup>C NMR spectrum of BOE.

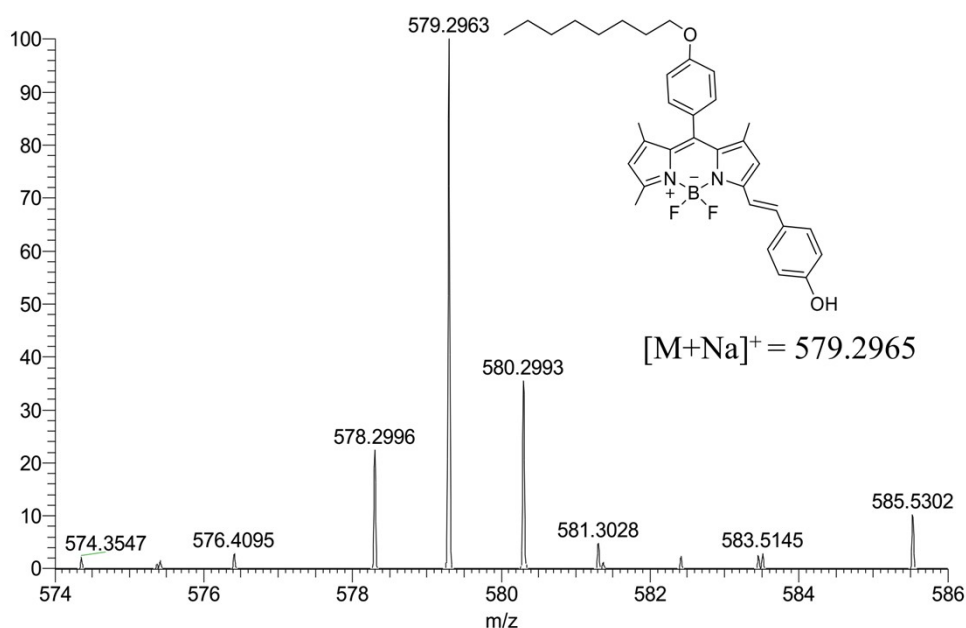

**Figure S4.** ESI-HRMS spectrum of BOE.

## II. lipid-water partition coefficient

After thoroughly mixing 50 mL ultra-pure water and 100 mL *n*-octanol in the liquid separation funnel, set aside for 24 h (at this time the two phases have been clarified) for use. The purpose is to saturate the water phase with *n*-octanol and the organic phase with water, so as to eliminate the experimental deviation caused by the partial miscibility of the two phases in the experiment. 9 mL of BOH or BOE solution was prepared with the above organic phase, and 3 mL of the solution was taken to determine the absorption spectrum. Take another 5 mL and store it in a sealed test tube, then add 5 mL of water phase, mix it fully and place it for 4 hours until it is clarified, and measure the absorption spectrum of the upper organic phase.

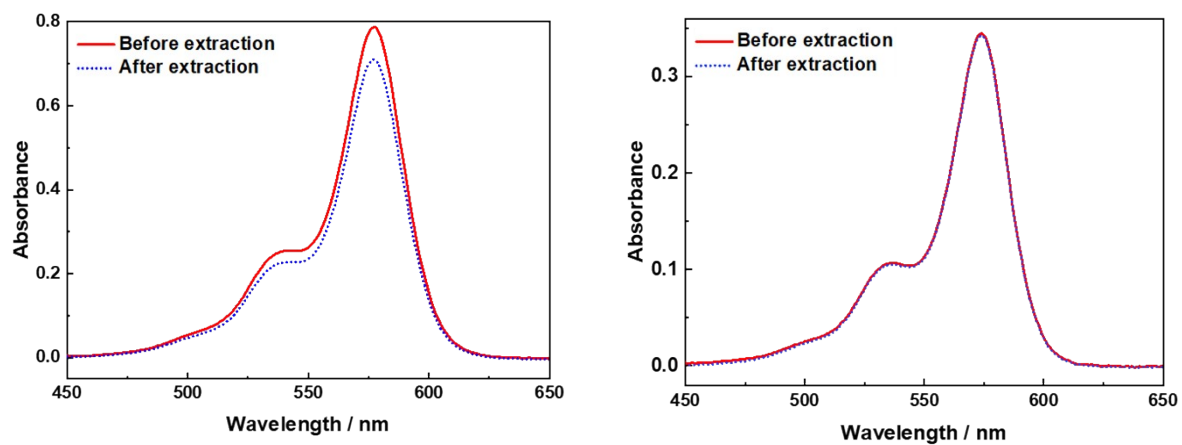

**Figure S5.** Absorption spectra of BOH (a) and BOE (b) in organic phase (*n*-octanol) before and after aqueous phase extraction (solid line).



### III. ESI-HRMS characterization of oxidative products of BOH and BOE

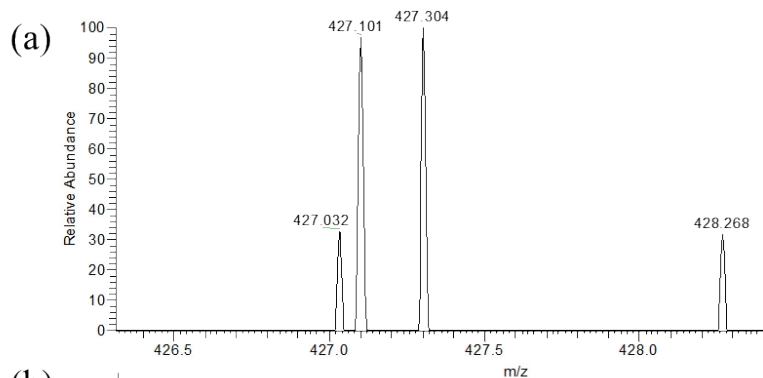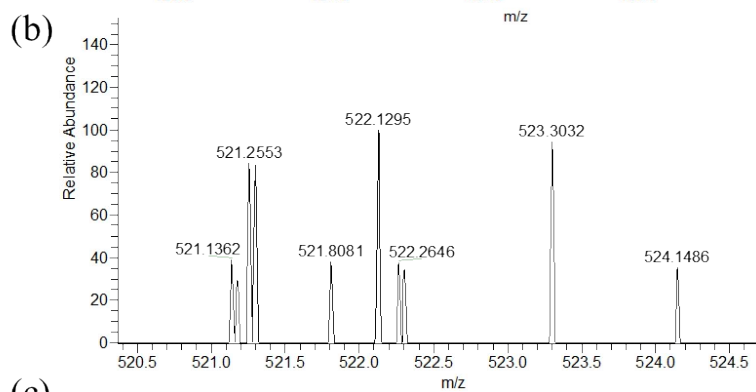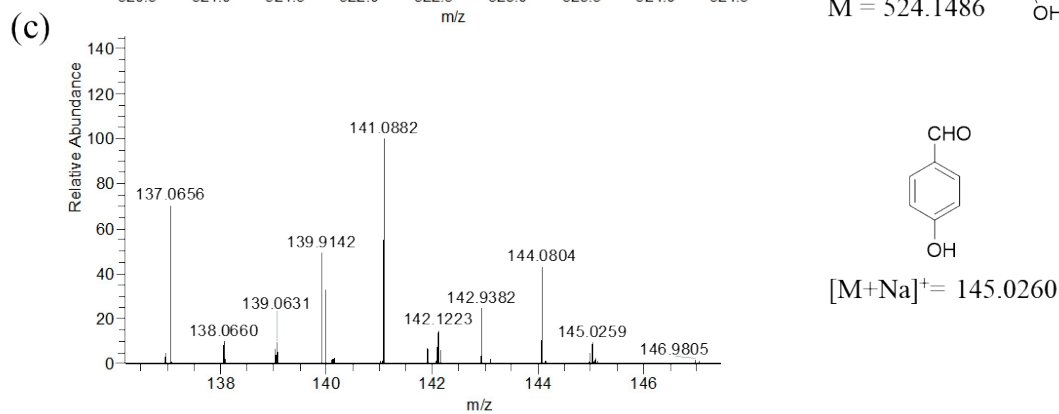

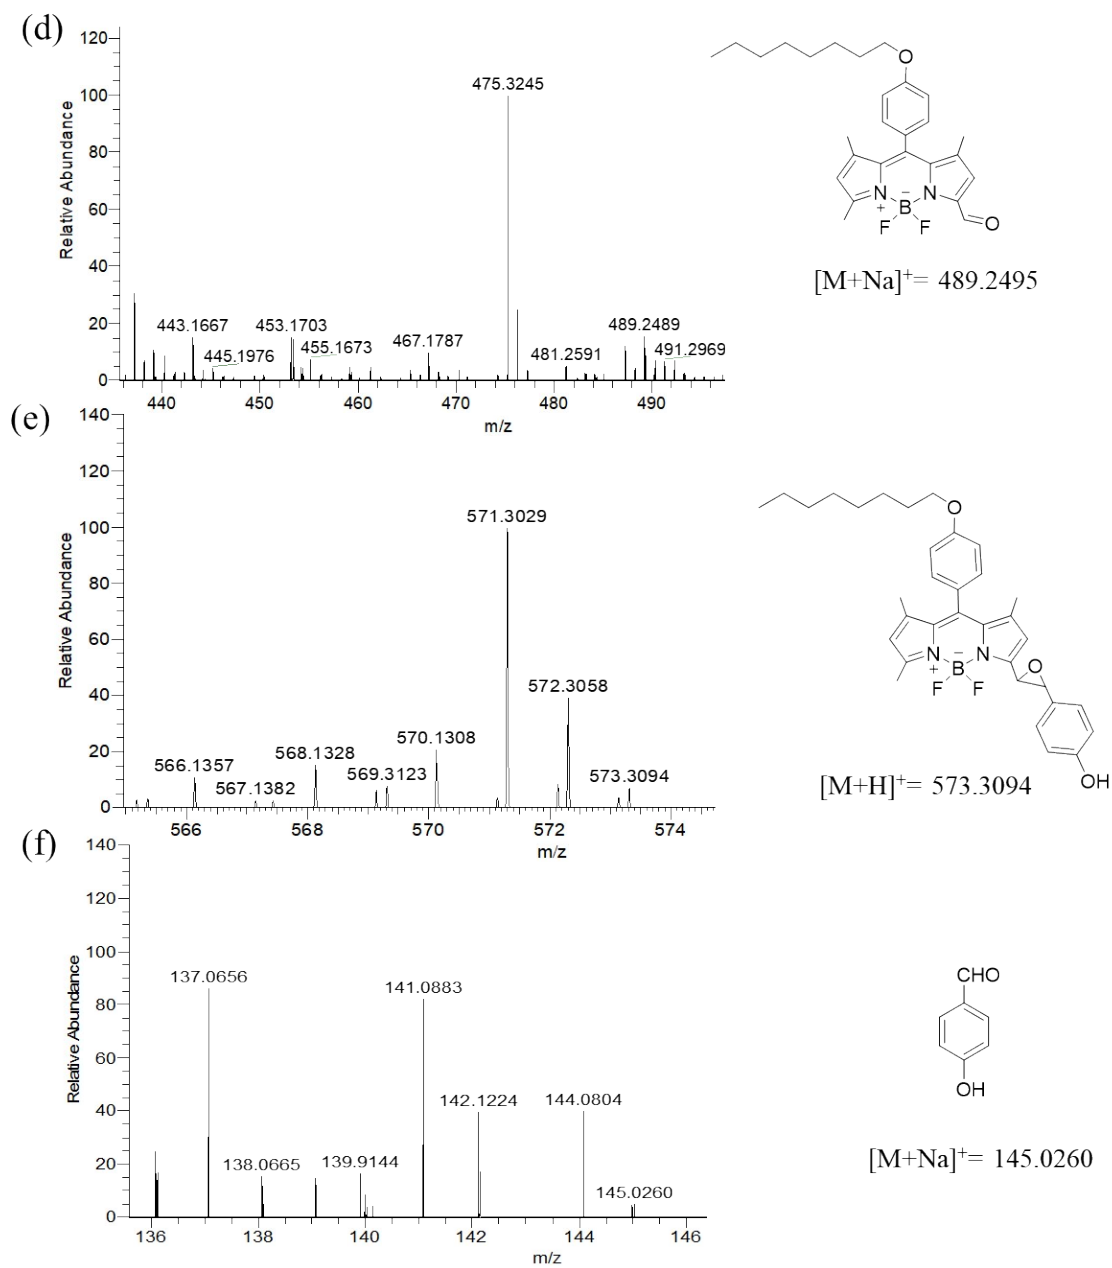

**Figure S6.** ESI-HRMS spectra of oxidation products of BOH (a), (b), (c) and BOE (d), (e), (f) reacting with ClO<sup>-</sup>/HClO, respectively.

#### IV. GUV morphology changes over time

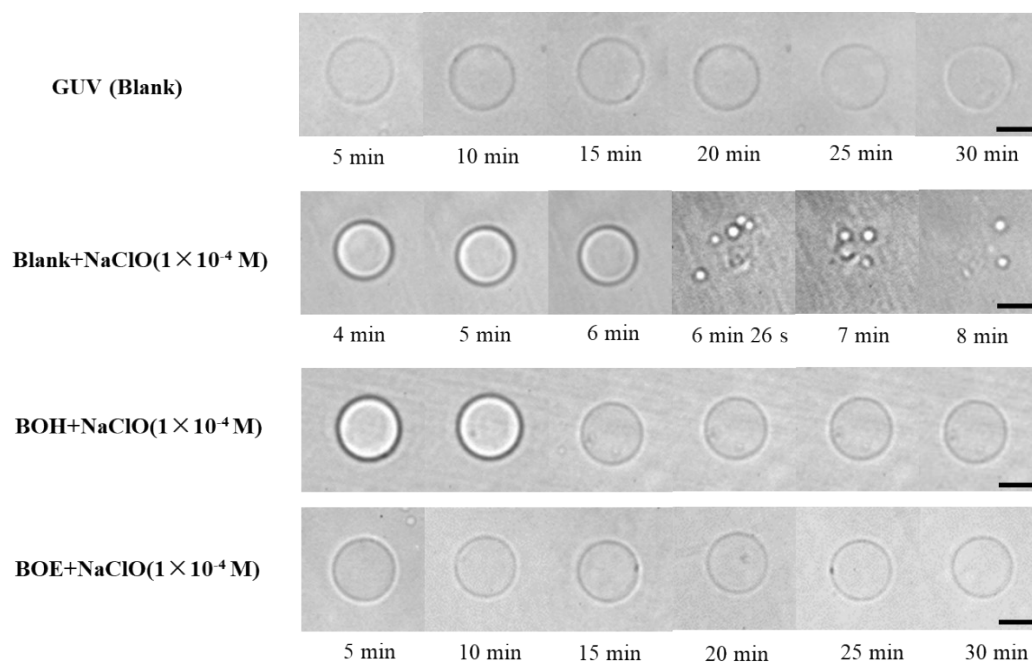

**Figure S7.** Image of GUV morphological change oxidized by  $\text{ClO}^-/\text{HClO}$  over time. (a) Blank GUV (control); (b) GUV with  $\text{NaClO}$  ( $1 \times 10^{-4}$  M); (c) GUV with  $\text{BOH}$  ( $5 \times 10^{-7}$  M) and  $\text{NaClO}$  ( $1 \times 10^{-4}$  M); (d) GUV with  $\text{BOE}$  ( $5 \times 10^{-7}$  M) and  $\text{NaClO}$  ( $1 \times 10^{-4}$  M). Scale bar = 10  $\mu\text{m}$ .

## V. HPLC-HRMS results of the oxidized products of PLPC and DOPC

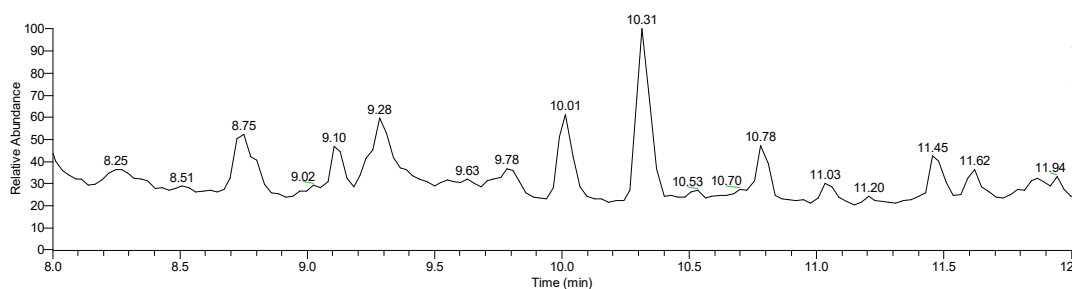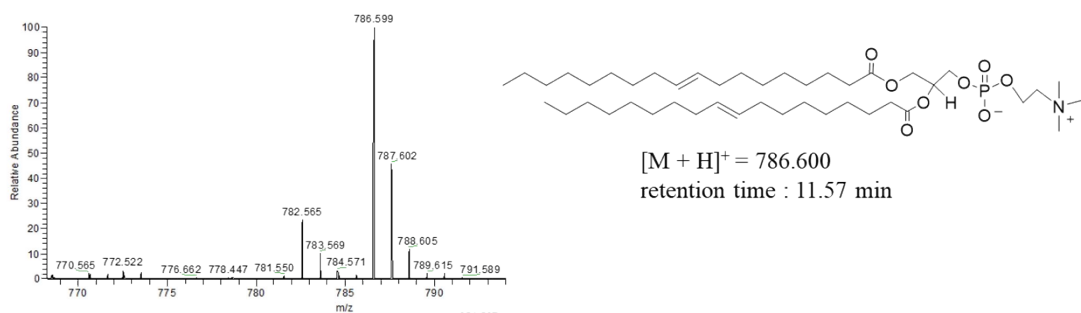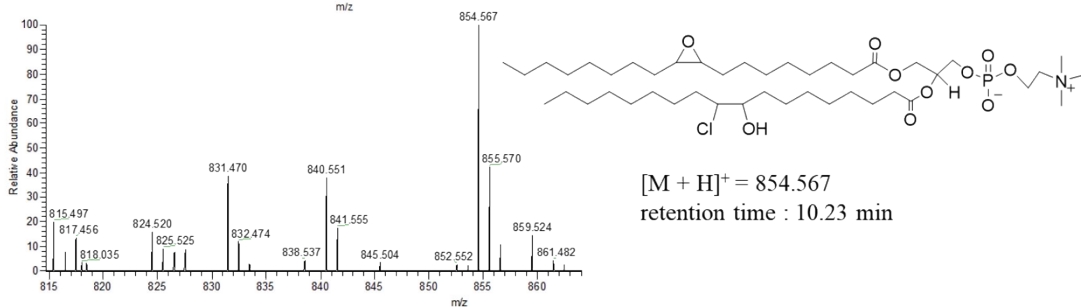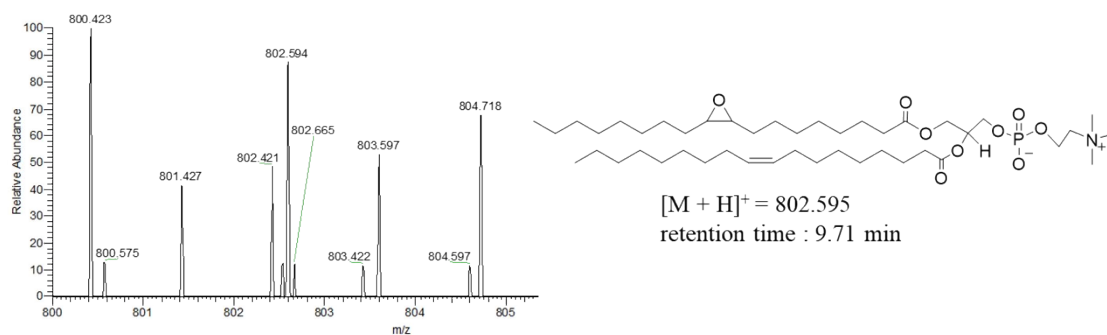

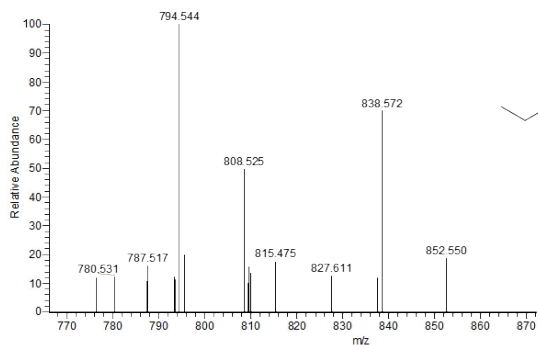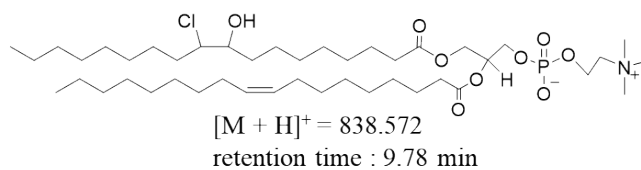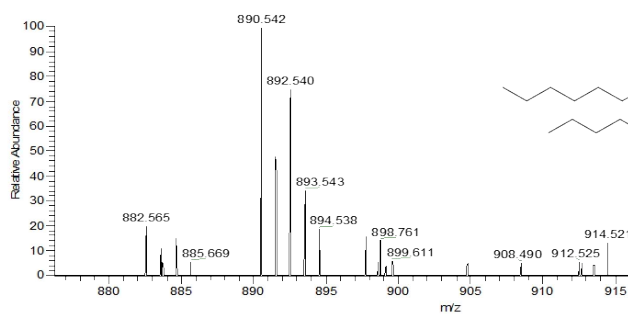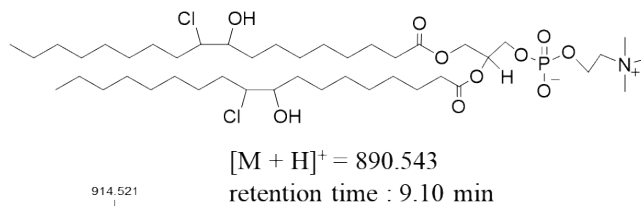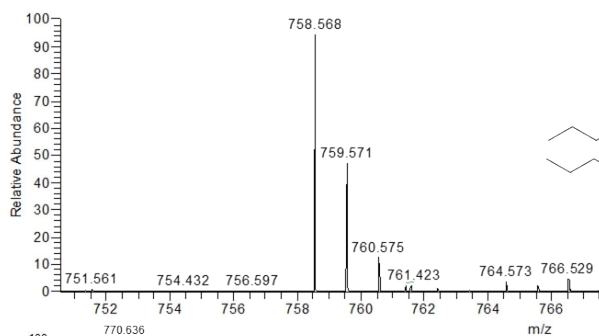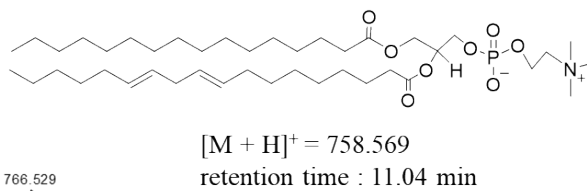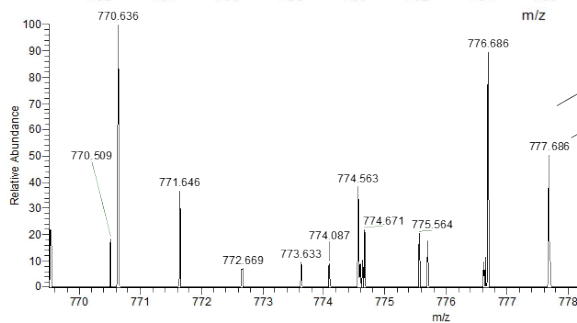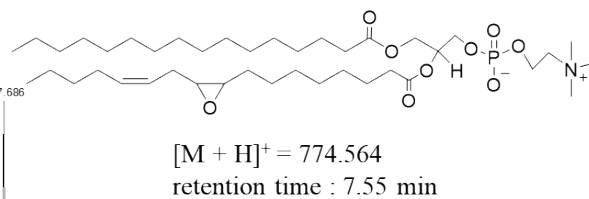

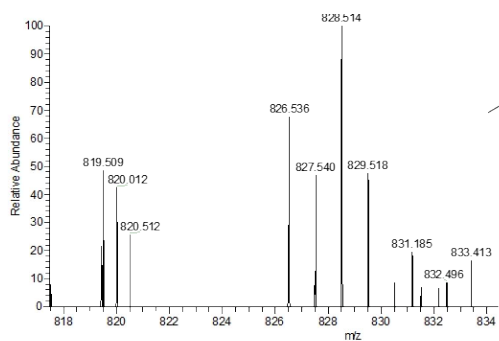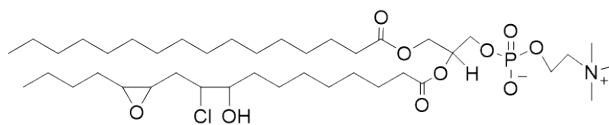

$[M + H]^+ = 826.535$   
retention time : 8.27 min

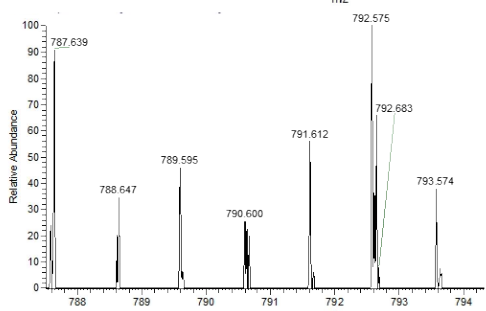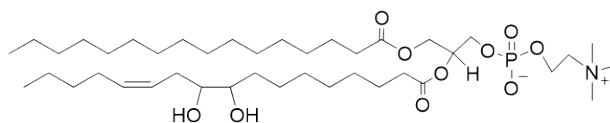

$[M + H]^+ = 792.574$   
retention time : 8.29 min

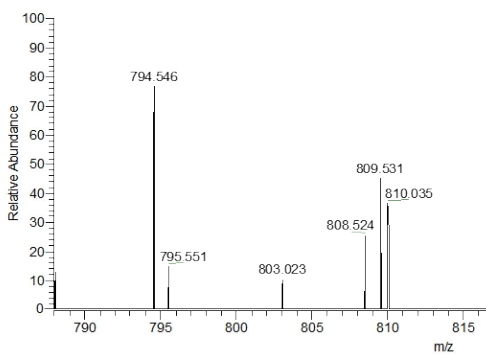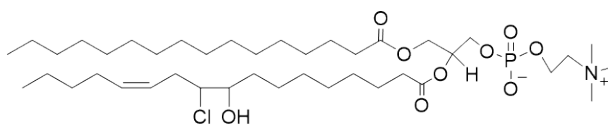

$[M + H]^+ = 809.532$   
retention time : 9.65 min

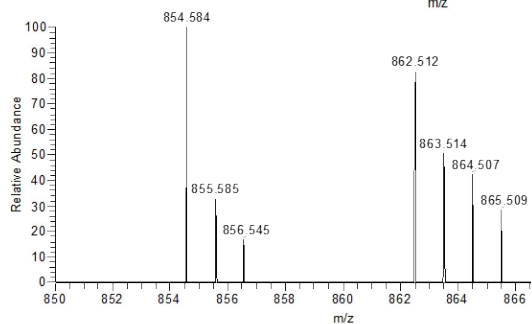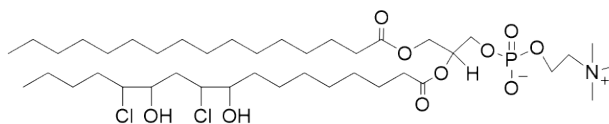

$[M + H]^+ = 862.512$   
retention time : 8.25 min

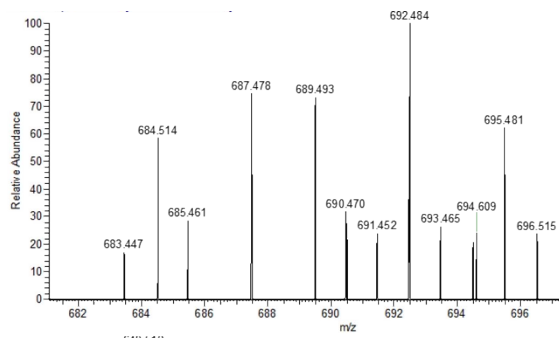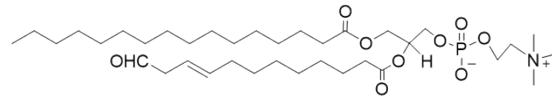

$[M+H]^+ = 690.470$   
retention time : 2.89 min

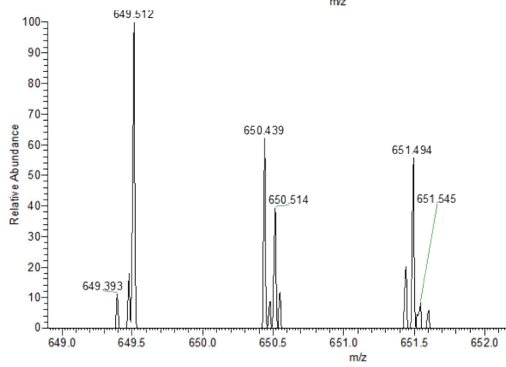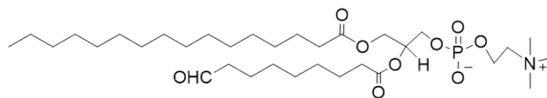

$[M+H]^+ = 650.439$   
retention time : 6.31 min

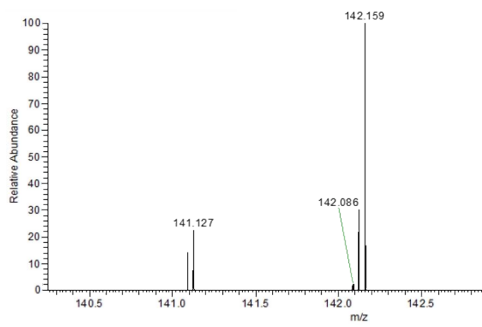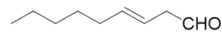

$[M+H]^+ = 141.127$   
retention time : 1.65 and 6.77 min

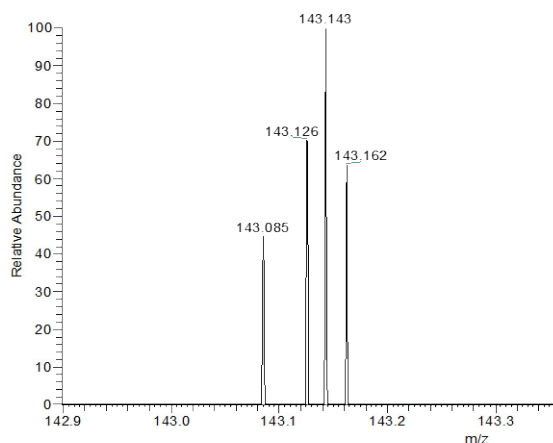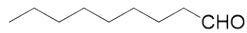

$[M+H]^+ = 143.143$   
retention time : 2.73 min

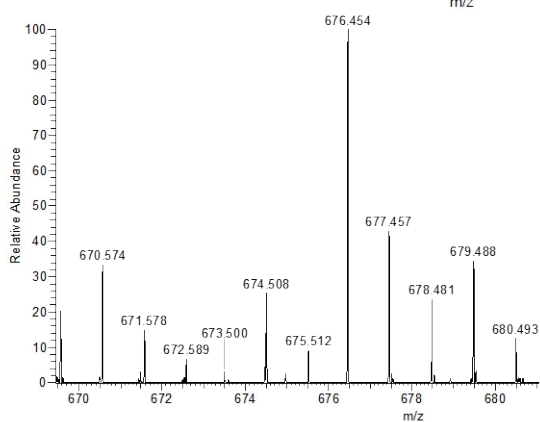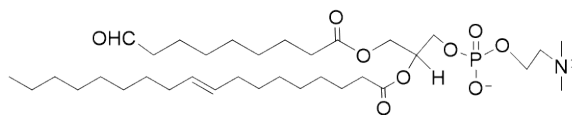

$[M+H]^+ = 676.455$   
retention time : 6.55 min

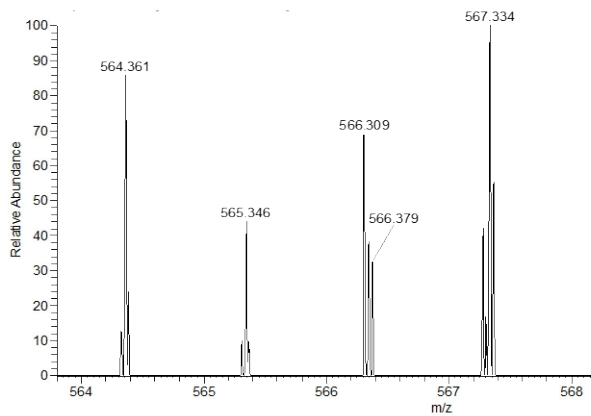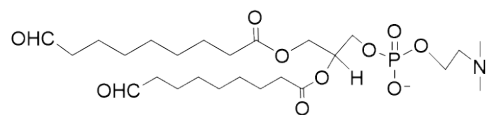

$[M+H]^+ = 566.309$   
retention time : 1.12 min

**Figure S8.** HPLC profile and the HRMS of the oxidized products of PLPC and DOPC reacting with NaClO ( $10^{-4}$  M) for 40min and their chemical structure formula.



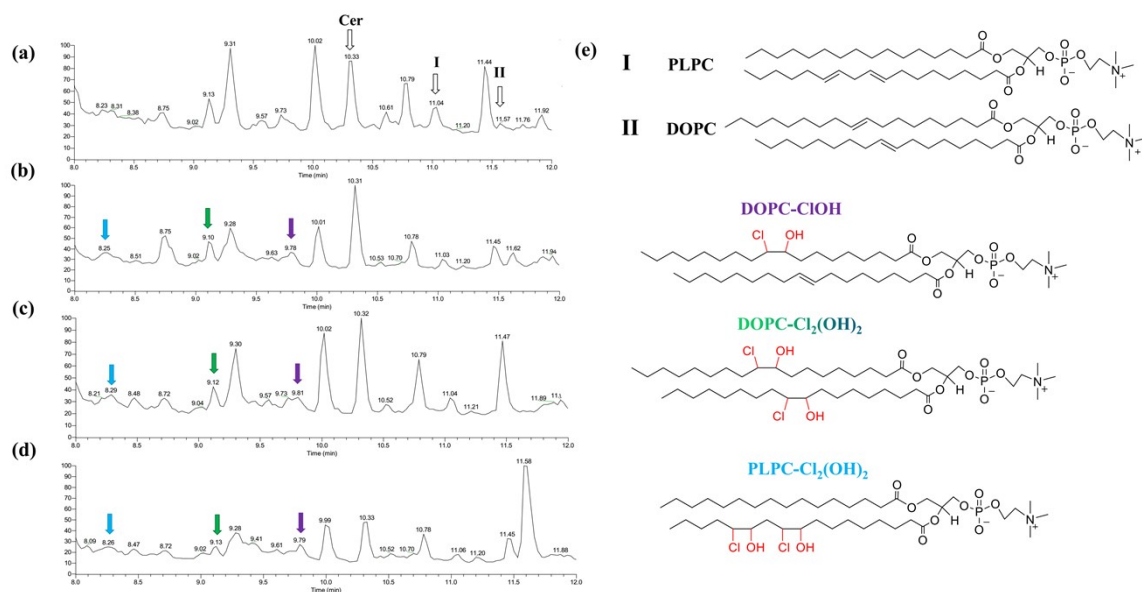

**Figure S9.** HPLC elution profiles of different GUUV preparations. (a) Blank GUUV (control). (b) Blank GUUV, (c) GUUV containing BOH ( $5 \times 10^{-7}$  M) and (d) GUUV containing BOE ( $5 \times 10^{-7}$  M), reacting with HClO/ClO<sup>-</sup> ( $5 \times 10^{-5}$  M) for 40 min, respectively. The measured contents of PLPC-Cl<sub>2</sub>(OH)<sub>2</sub>, DOPC-Cl<sub>2</sub>(OH)<sub>2</sub> and DOPC-ClOH are 1.06%, 0.87% and 0.93% in (b), 0.42%, 0.34% and 0.46% in (c), and 0.30%, 0.14% and 0.19% in (d), respectively. Internal label Cer is Ceramide.
